# Supplementary material
Source: publisher figshare collection journal article supplement (https://acs.figshare.com/ndownloader/files/4861648)
Supplement: Supplementary file 1 [file 4861648]

## Supporting Information

### **Spectroscopic Investigation of Plasma-Fluorinated Monolayer Graphene and Application for Gas Sensing**

*Hui Zhang,<sup>†,‡</sup> Liwei Fan,<sup>†,‡</sup> Huilong Dong,<sup>†</sup> Pingping Zhang,<sup>†</sup> Kaiqi Nie,<sup>†,§</sup> Jun  
Zhong,<sup>†</sup> Youyong Li,<sup>†</sup> Jinghua Guo,<sup>§</sup> Xuhui Sun<sup>\*,†</sup>*

<sup>†</sup>Jiangsu Key Laboratory for Carbon Based Materials and Devices, Institute of  
Functional Nano & Soft Materials (FUNSOM), Soochow University, Suzhou, Jiangsu  
215123, China

<sup>§</sup>Advanced Light Source, Lawrence Berkeley National Laboratory, Berkeley, CA  
94720, USA

<sup>‡</sup>These authors contributed equally to this work.

\* Corresponding Author E-mail: [xhsun@suda.edu.cn](mailto:xhsun@suda.edu.cn)

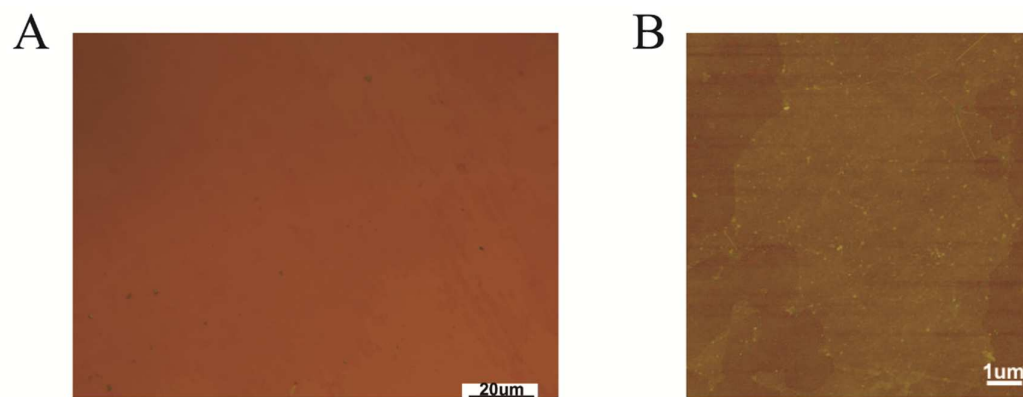

**Figure S1.** The optical microscopy (A) and low magnified AFM image (B) of FG-20 film.

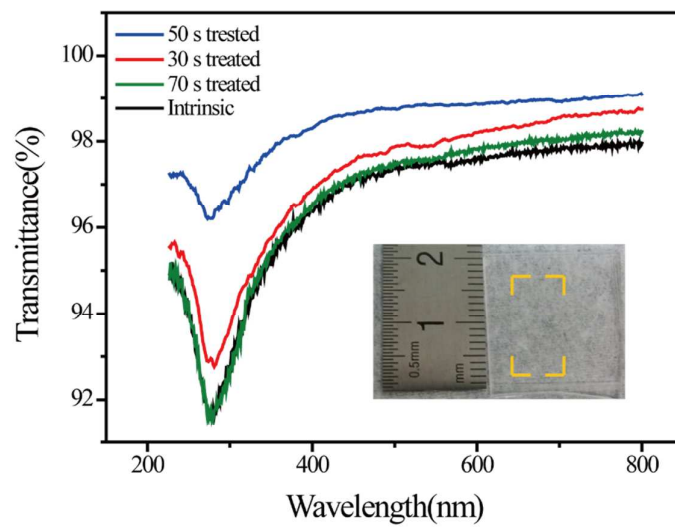

**Figure S2.** Ultraviolet-visible spectra (UV-vis) of intrinsic monolayer graphene and FG with 30 s, 50 s and 70 s plasma treatment.

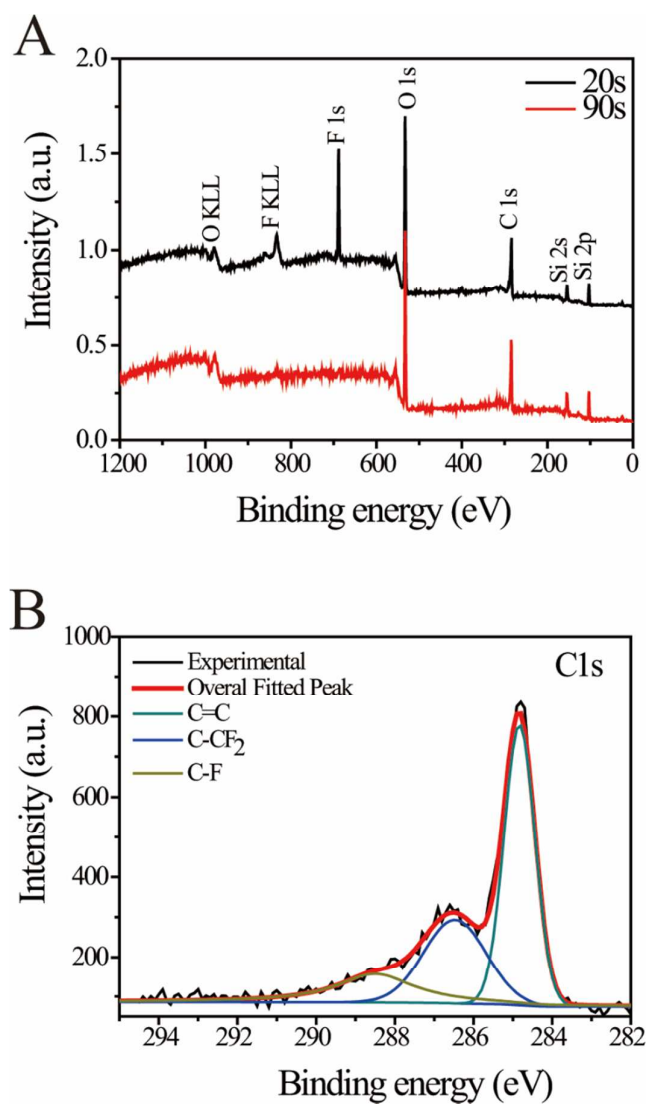

**Figure S3.** (A) XPS survey scan of FG-20 and FG-90 with fluorine content ~24.6% and ~4.6% respectively. (B) C 1s high resolution spectra of FG-90.

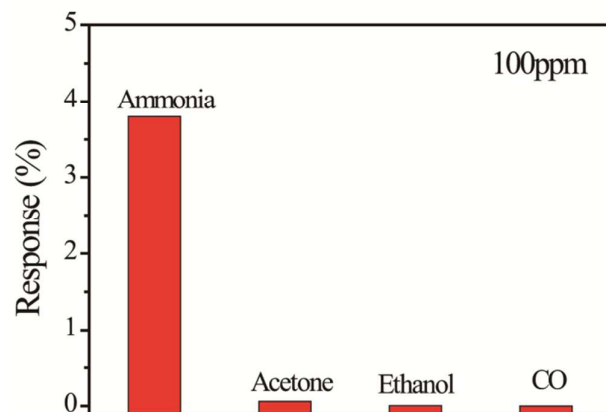

**Figure S4.** The responses of FG-20 based gas sensor for ammonia, CO, acetone and ethanol gas/vapor under air atmosphere at room temperature.

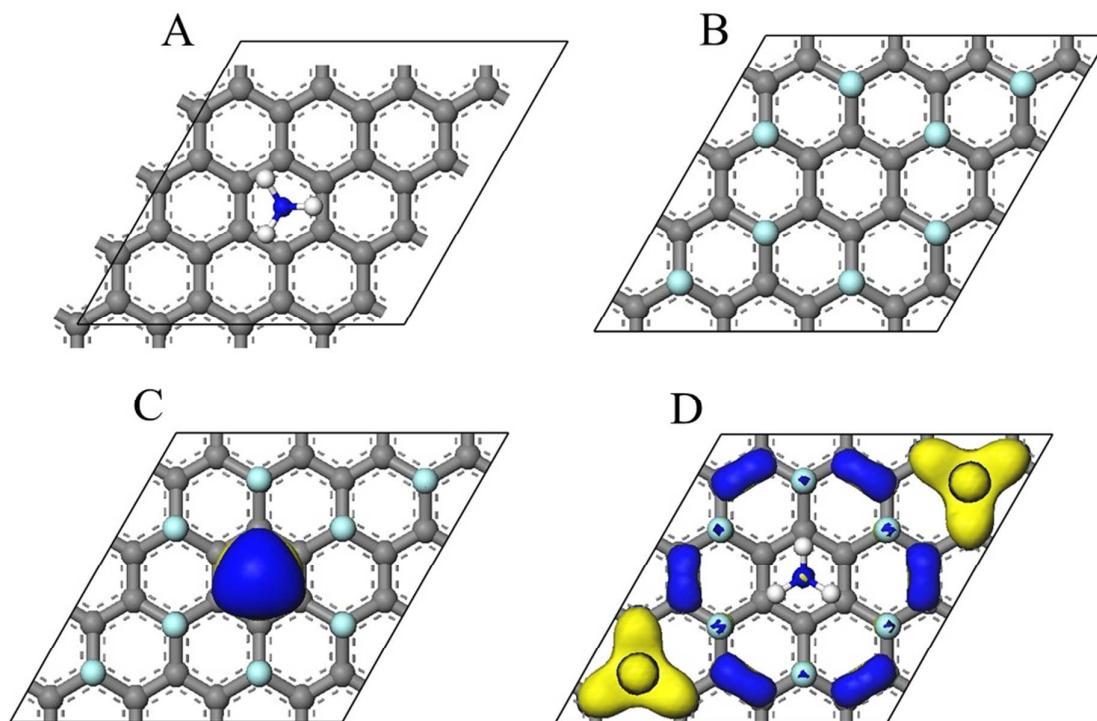

**Figure S5.** The most stable adsorption configuration of  $\text{NH}_3$  on graphene (A) and  $\text{CF}_{0.25}$ (B); The HOMO (C) and LUMO (D) of FG with ammonia adsorption.

**Table S1.** The content of fluorine and ration of C/F responding with the plasma treated time.

| Treatment time | 0s | 10s              | 20s                | 30s                | 40s                | 50s                | 60s                | 90s                 |
|----------------|----|------------------|--------------------|--------------------|--------------------|--------------------|--------------------|---------------------|
| F At%          | 0  | 20.16            | 24.59              | 18.74              | 14.74              | 13.16              | 10.95              | 4.56                |
| C - F          | C  | C <sub>4</sub> F | C <sub>3.1</sub> F | C <sub>4.3</sub> F | C <sub>5.8</sub> F | C <sub>6.6</sub> F | C <sub>8.1</sub> F | C <sub>20.9</sub> F |

**Table S2.** The Comparison of different sensor parameters of various device structures based on graphene and graphene dendrite.

| Type      | Graphene type                       | operating condition | detection levels/range | response              | response time | recovery time | reference |
|-----------|-------------------------------------|---------------------|------------------------|-----------------------|---------------|---------------|-----------|
| Resistive | CVD- graphene                       | 150-200°C           | 65-75 ppm              | 3.8-4.3%              | ~9-14 min     | ~7-12 min     | 1         |
| FET       | Partial reduced graphene oxide      | Room temperature    | 1%                     | 22.2%<br>((Gg-Ga)/Ga) | ~30 min       | 50 h          | 2         |
| resistive | vertically oriented graphene sheets | Room temperature    | 1%                     | 1.13%                 | 15min         | 25min         | 3         |
| Resistive | Graphene-Pt NPs                     | 25-100°C            | 6-58ppm                | 2%-15%                | ~15min        | >50min        | 4         |
| resistive | Fluorinated CVD-graphene            | room temperature    | 2-100ppm               | 0.3-3.8%              | 30s           | <200s         | this work |

**Reference:**

1. Gautam, M.; Jayatissa, A. H., Gas Sensing Properties of Graphene Synthesized by Chemical Vapor Deposition. Mater. Sci. Eng., C 2011, 31, 1405-1411.
2. Lu, G.; Ocola, L. E.; Chen, J., Reduced Graphene Oxide for Room-Temperature Gas Sensors. Nanotechnology 2009, 20, 445502..
3. Yu, K.; Wang, P.; Lu, G.; Chen, K.-H.; Bo, Z.; Chen, J., Patterning Vertically Oriented Graphene Sheets for Nanodevice Applications. J. Phys. Chem. Lett. 2011, 2, 537-542.
4. Gautam, M.; Jayatissa, A. H., Adsorption Kinetics of Ammonia Sensing by Graphene Films Decorated with Platinum Nanoparticles. J. Appl. Phys. 2012, 111, 094317.
